# Supplementary material for: Overoxidation of carbon-fiber microelectrodes enhances dopamine adsorption and increases sensitivityElectronic supplementary information (ESI) available: National Instruments Data Acquisition System. See http://www.rsc.org/suppdata/an/b3/b307024g/
Source: Royal Society of Chemistry journal article supplement (doi:10.1039/b307024g), 2003-01-01
Supplement: b307024g.doc [file b307024g.doc]

**Supplementary Materials**

**National Instruments Data Acquisition System**. Hardware included two computer interface boards available from National Instruments (Austin, TX): the PCI-6052 and PCI 6711. Two breakout boards from National Instruments (CB68-LPR) were also used along with 2 integrated circuits: a buffer chip (CD4050BE, Digikey, Thief River Falls, MN), and an operational amplifier (LM324, Texas Instruments, Dallas, TX). Figure 1 (supplemental information) provides an overview of the most important signal connections. Each of the lightly shaded rectangles represents one of the computer interface boards. The PCI-6052 is responsible for generation of the working electrode waveform, and collection of the data. These signals are interfaced with a potentiostat. The PCI-6711 controls the timing of events and generates the voltage to control other events, i.e. application of an external stimulus). There are also smaller rectangles that correspond to the integrated circuits. The arrowheads indicate the direction of information flow. The DAC signal from the PCI-6711 is input to a constant current source (Neurolog®). The Neurolog® is optically isolated from the system ground, so current does not flow from the stimulating electrodes to the working or reference electrodes.

The software is designed to collect repetitive cyclic voltammagrams. To do this, the triangle waveform is continuously applied to the electrode, even when data is not being collected. The user specifies the frequency at which triangle waveforms are to be applied. A timing diagram of important system signals is shown in Figure 2 (supplemental information). This output of counter 1 of the PCI-6711 (CVF, Figure 2, A) controls the timing for many other system events. The signal is a square wave of user specified frequency that determines the time between cyclic voltammograms. To allow this signal to be routed to several inputs, it is first passed through a non-inverting buffer chip (CD4050BE) to boost the power of the signal. Without this buffer, errors in system timing were observed.

The DAC output from the PCI-6052 is used to generate the waveform applied to the potentiostat (Figure 2, C). The output waveform for the DAC is designed to fit in the 2048 point FIFO buffer on the PCI-6052. The waveform is only written to the buffer once, and then is recycled, to remove the burden of waveform generation from the CPU. An intermittent train of pulses is used to update the DAC through one cycle of the waveform. The intermittent train is generated on counters 0 and 1 on the PCI-6052 (Figure 2, B). They are configured so that a trigger on the gate of counter 0 generates a burst of pulses from the output of counter 1. The trigger for the gate of counter 0 is generated with the CVF. Each pulse in the train of pulses then triggers the output of the next data point in the FIFO buffer to the DAC, and when appropriate acquisition of a data point by the ADC. The number of pulses is equal to the number of points in the waveform, so one iteration of the waveform is output for each trigger at the gate of counter 0, and the same number of data points can be collected by the ADC. The triangle waveform is continuously applied, but data are only collected when specified by the user.

Other events are controlled by counter 0 on the PCI-6711. The source of the counter is the CVF signal. While collecting a data file, it can generate a TTL output of specified duration at a specified time (Figure 2, D). This TTL output can then be used by the experimenter to perform virtually any task (switch a solenoid, iontophorese a substance, and move the electrode). The TTL can also be used to trigger the output of a waveform from the DAC of the PCI-6711 (Figure 2, E). This waveform can only be output once per data file, and is typically used to drive a constant current source to stimulate neurons, but can be used for other purposes. To monitor the delivery of stimuli, an operational amplifier (LM324) was configured as a comparator. When the output of the DAC on the PCI-6711 went about 0.5 V, the output of the LM324 was driven high. The output was used to control a LED to provide visual confirmation of the stimulus to the user.

A breakout box (CB68-LPR, National Instruments) was designed for signal connections. A 68 pin SCSI cable connected the PCI-6052 and the PCI-6711 to a CB68-LPR.
